# Supplementary material for: Loss of Mgat5a-mediated N-glycosylation stimulates regeneration in zebrafish
Source: PubMed Central journal article supplement (PMC5072312; doi:10.1186/s13619-016-0031-5), 2016-10-20

# Suppl. Fig. 1

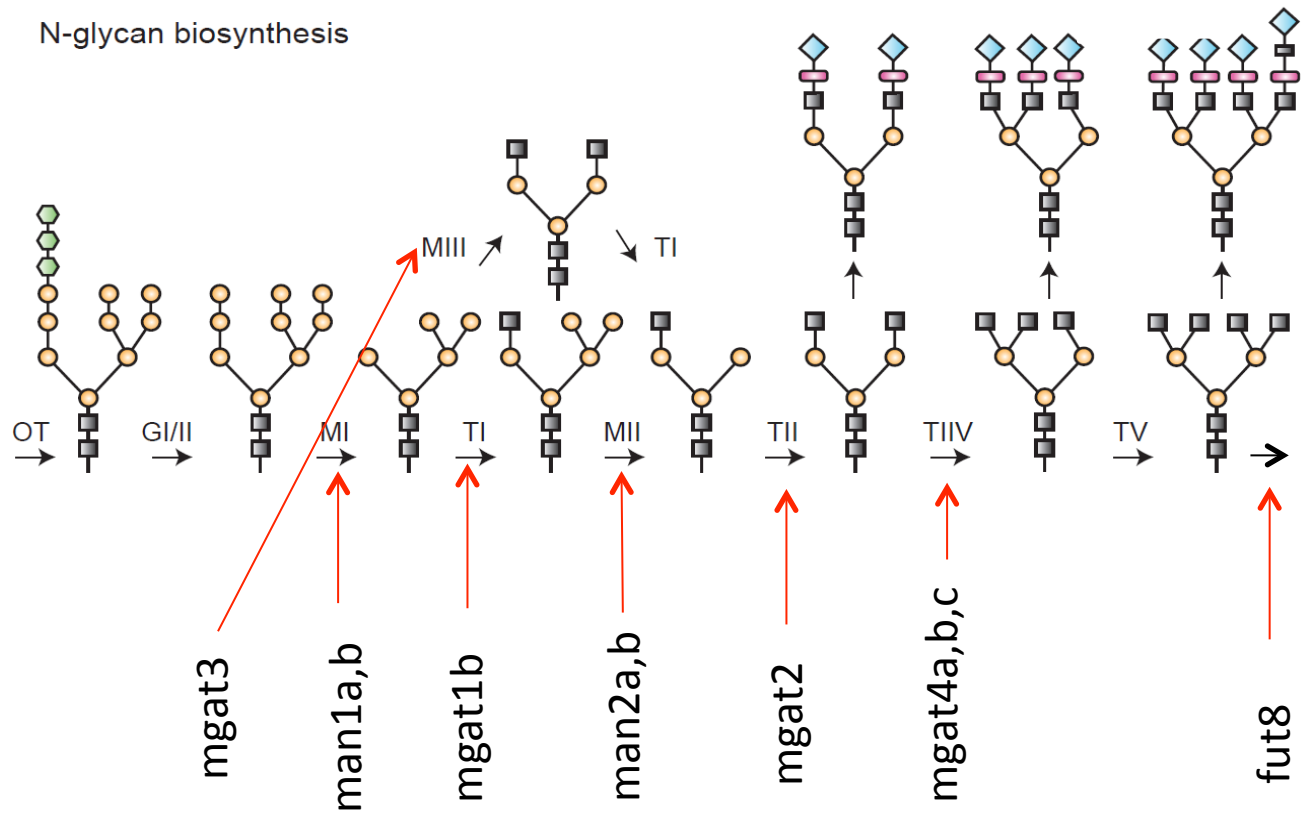

## Suppl. Fig. 2

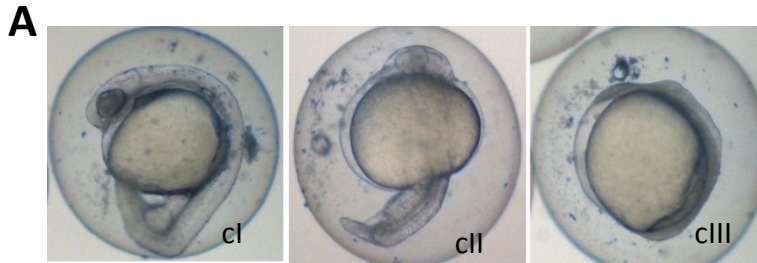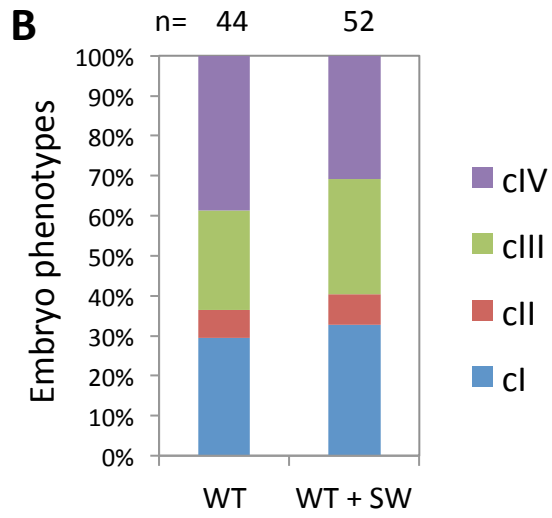

Supplement: 13619_2016_31_MOESM1_ESM.pdf [file 13619_2016_31_MOESM1_ESM.pdf]
